# Supplementary material
Source: Research Square preprint supplement (doi:10.21203/rs.3.rs-10142440/v1)
Supplement: Supplementary file 1 [file acc40c82ea3740c917536e52.docx]

**Supplementary Tables**

**Table S1.** Physicochemical parameters of bulk soils sampled 50 cm from 5YO (plum and maple trees) and 10YO (plum and quince trees) trees and from control vines. Soil samples were collected at 0-30 cm depth. Means (± SD) are indicated (n=6 for soils near control vines; n=12 for soils near 10YO or 5YO trees). Different letters indicate significant differences among groups (*P* < 0.05).

|  | **10YO trees** | **5YO trees** | **Control vines** |
| --- | --- | --- | --- |
| **Variable** |  |  |  |
| Total soil organic carbon, SOC (%) | 1.71 ± 0.35 a | 1.37 ± 0.23 b | 1.16 ± 0.26 b |
| Soil organic matter, SOM (%) | 2.94 ± 0.61 a | 2.36 ± 0.39 b | 2 ± 0.45 b |
| Total nitrogen, TN (‰) | 1.4 ± 0.26 a | 1.14 ± 0.16 b | 1.01 ± 0.15 b |
| C:N ratio | 12.15 ± 0.52 a | 11.93 ± 0.49 a | 11.43 ± 1.07 a |
| pH_H2O | 6.22 ± 0.32 a | 6.29 ± 0.36 a | 6.53 ± 0.36 a |
| pH_KCl | 5.38 ± 0.32 a | 5.35 ± 0.41 a | 5.55 ± 0.27 a |
| **Oxide equivalent concentration** |  |  |  |
| K₂O (mg kg⁻¹) | 89.58 ± 55.72 a | 99.67 ± 45.46 a | 95 ± 42.38 a |
| MgO (mg kg⁻¹) | 173.25 ± 108.54 a | 179.75 ± 100.23 a | 216.33 ± 201.67 a |
| P2O5_Dyer (mg kg⁻¹) | 219.33 ± 60.95 a | 203.67 ± 37.45 a | 185.33 ± 30.51 a |
| P2O5_Olsen (mg kg⁻¹) | 56.33 ± 12.07 ab | 54.42 ± 7.42 a | 47.33 ± 3.2 b |
| **Elemental concentrations** |  |  |  |
| K (mg kg⁻¹) | 74.35 ± 46.25 a | 82.72 ± 37.73 a | 78.85 ± 35.18 a |
| Mg (mg kg⁻¹) | 103.95 ± 65.12 a | 107.85 ± 60.14 a | 129.8 ± 121 a |
| P_Dyer (mg kg⁻¹) | 95.63 ± 26.57 a | 88.8 ± 16.33 a | 80.81 ± 13.3 a |
| P_Olsen (mg kg⁻¹) | 24.56 ± 5.26 ab | 23.73 ± 3.23 a | 20.64 ± 1.4 b |
| K.Mg | 0.73 ± 0.26 a | 0.84 ± 0.32 a | 0.82 ± 0.35 a |
| **Other** |  |  |  |
| Mn (mg kg⁻¹) | 16.42 ± 5.2 a | 17.99 ± 6.32 a | 14.3 ± 5.43 a |
| SO₄²⁻ (mg kg⁻¹) | 59.98 ± 28.15 a | 46.14 ± 12.9 ab | 35.55 ± 4.32 b |

**Table S2.** Grapevine physiological status, petiole nutrient composition, must composition, isotopic signature, and yield components were measured under three conditions: grapevines associated with 10YO plum trees, 5YO plum trees, and control vines without trees. Values are presented as mean ± SD, with Dualex measurements (n=24-12); petiole analyses (n=6); must and isotopic analyses, and yield (n=12-11). The first number in parentheses indicates the number of independent biological samples for plum trees, and the second number refers to control grapevines samples. In the table, different letters indicate significant differences among treatments (*P* < 0.05) based on appropriate statistical tests (ANOVA or Kruskal–Wallis followed by post hoc comparisons depending on data distribution and homoscedasticity). Dualex® measurements correspond to relative optical indices of leaf chlorophyll content (Chl) and epidermal flavonol content (Flav), while the Nitrogen Balance Index (NBI) was calculated as the ratio between chlorophyll and flavonol indices. DW, dry weight.

|  | **10YO plum tree** | **5YO plum tree** | **Control vines** |
| --- | --- | --- | --- |
| **Dualex** |  |  |  |
| Chl (Dualex index) | 15.05 ± 2.33 a | 12.83 ± 1.37 b | 12.81 ± 1.82 b |
| Flav (Dualex index) | 2.91 ± 0.19 a | 2.96 ± 0.14 ab | 3.11 ± 0.18 b |
| NBI (ratio Chl / Flav) | 5.22 ± 1.02 a | 4.34 ± 0.48 b | 4.10 ± 0.43 b |
| **Petiole analysis** |  |  |  |
| **Macro-elements (% DW, w/w)** |  |  |  |
| Nitrogen (% DW) | 0.73 ± 0.21 a | 0.61 ± 0.03 a | 0.64 ± 0.05 a |
| Phosphorus (% DW) | 0.20 ± 0.12 a | 0.15 ± 0.04 a | 0.19 ± 0.06 a |
| Potassium (% DW) | 2.21 ± 1.11 a | 2.82 ± 1.24 a | 1.96 ± 0.55 a |
| Magnesium (% DW) | 0.53 ± 0.16 a | 0.49 ± 0.17 a | 0.52 ± 0.17 a |
| Sodium (% DW) | 0.44 ± 0.10 a | 0.63 ± 0.08 a | 0.68 ± 0.26 a |
| Sulfur (% DW) | 0.24 ± 0.06 a | 0.27 ± 0.06 a | 0.24 ± 0.07 a |
| Calcium (% DW) | 1.85 ± 0.40 a | 1.94 ± 0.11 a | 1.94 ± 0.48 a |
| **Micro-elements (ppm DW)** |  |  |  |
| Aluminum (ppm DW) | 22.67 ± 7.58 a | 23.50 ± 5.54 a | 24.67 ± 6.25 a |
| Boron (ppm DW) | 32.50 ± 5.58 a | 34.67 ± 2.34 a | 34.17 ± 9.11 a |
| Copper (ppm DW) | 198.17 ± 29.48 a | 253.83 ± 8.77 b | 270.00 ± 78.11 ab |
| Iron (ppm DW) | 75.50 ± 27.05 a | 67.67 ± 19.97 a | 64.00 ± 15.85 a |
| Manganese (ppm DW) | 261.00 ± 83.44 a | 226.67 ± 107.05 a | 224.83 ± 72.16 a |
| Zinc (ppm DW) | 148.67 ± 40.74 a | 173.83 ± 42.37 a | 168.17 ± 50.50 a |
| **Must analysis** |  |  |  |
| Yeast assimilable nitrogen (YAN, mg N L⁻¹) | 55.17 ± 6.88 ab | 70.00 ± 11.01 a | 49.63 ± 14.30 b |
| Amino nitrogen (mg N L⁻¹) | 32.51 ± 3.75 a | 47.66 ± 10.91 b | 30.17 ± 7.63 a |
| Ammonium nitrogen (mg N L⁻¹) | 22.67 ± 6.71 a | 22.34 ± 8.65 a | 19.46 ± 6.14 a |
| Sugar (g L⁻¹) | 201.28 ± 6.48 a | 200.29 ± 10.42 a | 199.11 ± 14.13 a |
| Density (g mL⁻¹) | 1.09 ± 0.00 a | 1.09 ± 0.00 a | 1.09 ± 0.01 a |
| Potential alcohol (% vol) | 11.96 ± 0.39 a | 11.90 ± 0.62 a | 11.83 ± 0.84 a |
| pH | 3.14 ± 0.05 a | 3.23 ± 0.06 a | 3.18 ± 0.06 a |
| Gluconic acid (g L⁻¹) | 0.37 ± 0.08 a | 0.37 ± 0.08 a | 0.28 ± 0.12 b |
| Malic acid (g L⁻¹) | 1.92 ± 0.46 a | 2.03 ± 0.72 a | 1.50 ± 0.38 a |
| Tartaric acid (g L⁻¹) | 10.20 ± 0.46 a | 9.65 ± 0.71 b | 9.94 ± 0.40 ab |
| Total acidity (g L⁻¹ H₂SO₄) | 4.34 ± 0.35 a | 4.07 ± 0.44 ab | 3.91 ± 0.38 b |
| Volatile acidity (g L⁻¹ H₂SO₄) | 0.09 ± 0.01 a | 0.08 ± 0.01 a | 0.07 ± 0.01 a |
| **Isotopic analysis** |  |  |  |
| δ¹³C (‰) | -26.50 ± 0.96 a | -25.99 ± 0.80 a | -27.15 ± 0.41 a |
| **Yield** |  |  |  |
| 100-berry weight (g) | 146.00 ± 23.97 a | 151.25 ± 19.39 a | 147.36 ± 20.34 a |
| Bunch weight per grapevine (g) | 829.46 ± 380.81 a | 816.67 ± 401.03 a | 640.00 ± 417.95 a |

|  | **10YO trees** | **5YO trees** | **Control vines** | |
| --- | --- | --- | --- | --- |
| **Dualex** |  |  |  |  |
| Chl (Dualex index) | 14.64 ± 1.92 a | 12.73 ± 1.66 b | 12.81 ± 1.82 b | |
| Flav (Dualex index) | 2.96 ± 0.19 a | 3.00 ± 0.18 ab | 3.11 ± 0.18 b | |
| NBI (ratio Chl / Flav) | 4.98 ± 1.01 a | 4.24 ± 0.51 b | 4.10 ± 0.43 b | |
| **Petiole analysis** |  |  |  |  |
| **Macro-elements (% DW, w/w)** |  |  |  |  |
| Nitrogen (% DW) | 0.67 ± 0.17 a | 0.59 ± 0.03 a | 0.64 ± 0.05 a | |
| Phosphorus (% DW) | 0.20 ± 0.12 a | 0.18 ± 0.06 a | 0.19 ± 0.06 a | |
| Potassium (% DW) | 2.28 ± 1.06 a | 2.84 ± 1.09 a | 1.96 ± 0.55 a | |
| Magnesium (% DW) | 0.52 ± 0.18 a | 0.46 ± 0.13 a | 0.52 ± 0.17 a | |
| Sodium (% DW) | 0.47 ± 0.11 a | 0.64 ± 0.09 b | 0.68 ± 0.26 b | |
| Sulfur (% DW) | 0.24 ± 0.06 a | 0.25 ± 0.06 a | 0.24 ± 0.07 a | |
| Calcium (% DW) | 1.96 ± 0.44 a | 1.91 ± 0.15 a | 1.94 ± 0.48 a | |
| **Micro-elements (ppm DW)** |  |  |  |  |
| Al (ppm DW) | 24.50 ± 7.72 a | 23.08 ± 4.81 a | 24.67 ± 6.25 a | |
| Boron (ppm DW) | 34.00 ± 6.28 a | 33.92 ± 2.68 a | 34.17 ± 9.11 a | |
| Copper (ppm DW) | 216.67 ± 49.95 a | 252.75 ± 26.97 a | 270.00 ± 78.11 a | |
| Iron (ppm DW) | 74.08 ± 27.46 a | 63.58 ± 16.46 a | 64.00 ± 15.85 a | |
| Manganese (ppm DW) | 259.58 ± 101.27 a | 236.00 ± 103.58 a | 224.83 ± 72.16 a | |
| Zinc (ppm DW) | 154.17 ± 43.73 a | 170.00 ± 36.89 a | 168.17 ± 50.50 a | |
| **Must analysis** |  |  |  |  |
| Yeast assimilable nitrogen (YAN, mg N L⁻¹) | 55.58 ± 9.74 a | 62.51 ± 12.89 a | 49.63 ± 14.30 a |  |
| Amino nitrogen (mg N L⁻¹) | 34.19 ± 7.37 ab | 41.69 ± 10.92 a | 30.17 ± 7.63 b | |
| Ammonium nitrogen (mg N L⁻¹) | 21.40 ± 6.32 a | 20.82 ± 8.02 a | 19.46 ± 6.14 a | |
| Sugar (g L⁻¹) | 200.51 ± 7.48 a | 198.05 ± 9.70 a | 199.11 ± 14.13 a | |
| Density (g mL⁻¹) | 1.09 ± 0.00 a | 1.09 ± 0.00 a | 1.09 ± 0.01 a | |
| Potential alcohol (% vol) | 11.91 ± 0.45 a | 11.77 ± 0.58 a | 11.83 ± 0.84 a | |
| pH | 3.16 ± 0.08 a | 3.22 ± 0.06 b | 3.18 ± 0.06 ab | |
| Gluconic acid (g L⁻¹) | 0.34 ± 0.09 ab | 0.37 ± 0.08 a | 0.28 ± 0.13 b | |
| Malic acid (g L⁻¹) | 1.88 ± 0.51 ab | 2.05 ± 0.68 a | 1.50 ± 0.38 b | |
| Tartaric acid (g L⁻¹) | 10.08 ± 0.61 a | 9.69 ± 0.59 b | 9.94 ± 0.40 ab | |
| Total acidity (g L⁻¹ H₂SO₄) | 4.24 ± 0.46 a | 4.09 ± 0.49 a | 3.91 ± 0.38 a | |
| Volatile acidity (g L⁻¹ H₂SO₄) | 0.09 ± 0.02 a | 0.08 ± 0.01 a | 0.07 ± 0.01 a | |
| **Isotopic analysis** |  |  |  |  |
| δ¹³C (‰) | -26.23 ± 1.24 a | -26.22 ± 0.89 a | -27.15 ± 0.41 a | |
| **Yield** |  |  |  |  |
| 100-berry weight (g) | 147.58 ± 20.41 a | 153.25 ± 18.83 a | 147.36 ± 20.34 a | |
| Bunch weight per grapevine (g) | 785.94 ± 310.04 a | 886.90 ± 375.49 a | 640.00 ± 417.95 a | |

**Table S3.** Grapevine physiological status, petiole nutrient composition, must composition, isotopic signature, and yield components were measured under three conditions: grapevines associated with 10YO trees, 5YO trees, and control vines without trees. Values are presented as mean ± SD, with Dualex (n=48-12) ; petiole analyses (n=12-6) ; must and isotopic analyses, and yield (n=24-11). The first number in parentheses indicates the number of independent biological samples for plum trees, and the second number refers to control grapevines. In the table different letters indicate significant differences among treatments (P < 0.05) based on appropriate statistical tests (ANOVA or Kruskal–Wallis followed by post hoc comparisons depending on data distribution and homoscedasticity). Dualex® measurements correspond to relative optical indices of leaf chlorophyll content (Chl) and epidermal flavonol content (Flav), while the Nitrogen Balance Index (NBI) was calculated as the ratio between chlorophyll and flavonol indices. DW, dry weight.
